# Supplementary material for: Comparison of Visit Rates Before vs After Telehealth Expansion Among Patients With Mental Health Diagnoses Treated at Federally Qualified Health Centers
Source: PubMed Central journal article supplement (PMC9667322; doi:10.1001/jamanetworkopen.2022.42059), 2022-11-15
Supplement: jamanetwopen-e2242059-s001.pdf [file jamanetwopen-e2242059-s001.pdf]

## Supplementary Online Content

Cole MB, Lee EK, Davoust M, Carey K, Kim JH. Comparison of visit rates before vs after telehealth expansion among patients with mental health diagnoses treated at federally qualified health centers. *JAMA Netw Open*. 5(11):e2242059. doi:10.1001/jamanetworkopen.2022.42059

**eAppendix 1.** FQHCs in Study Sample Compared to FQHCs Excluded From the Study Sample

**eAppendix 2.** Defining Telehealth

**eAppendix 3.** Defining High Versus Low Telehealth FQHCs

**eAppendix 4.** Identifying Video vs Audio-Only Telehealth Visits

This supplementary material has been provided by the authors to give readers additional information about their work.

eAppendix 1. FQHCs in study sample compared to FQHCs excluded from the study sample

Table A1-1. Comparison of patient characteristics at C3 FQHCs that were included in the study sample vs C3 FQHCs that were excluded due to invalid telehealth data

|                                                 | Included                  | Excluded                 |
|-------------------------------------------------|---------------------------|--------------------------|
| Characteristic                                  | (N=143,205 person-months) | (N=48,213 person-months) |
| Age, mean (SD)                                  | 37.80                     | 38.14                    |
| Female, %                                       | 61.30%                    | 60.97%                   |
| Race/ethnicity, %*                              |                           |                          |
| White, non-Hispanic                             | 37.20%                    | 37.43%                   |
| Non-White                                       | 62.80%                    | 62.57%                   |
| Primary language is English, % <sup>b</sup>     | 73.10%                    | 73.99%                   |
| CDPS risk score, mean (SD)                      | 2.38                      | 2.41                     |
| Clinical diagnoses, %                           |                           |                          |
| Diabetes                                        | 9.50%                     | 9.38%                    |
| COPD                                            | 6.10%                     | 5.17%                    |
| Asthma                                          | 20.20%                    | 15.94%                   |
| Hypertension                                    | 20.00%                    | 25.27%                   |
| Hyperlipidemia                                  | 14.20%                    | 15.62%                   |
| Overweight or obese                             | 36.20%                    | 35.39%                   |
| Morbidity obese                                 | 9.50%                     | 5.57%                    |
| Tobacco use                                     | 31.60%                    | 31.82%                   |
| Alcohol use disorder                            | 12.50%                    | 13.46%                   |
| Cannabis use disorder                           | 6.40%                     | 4.76%                    |
| All other substance use                         | 14.60%                    | 19.53%                   |
| <i>Mental health disorders</i>                  |                           |                          |
| Major depression                                | 49.60%                    | 51.27%                   |
| Other depression                                | 7.50%                     | 9.70%                    |
| Anxiety                                         | 50.20%                    | 51.76%                   |
| ADHD                                            | 11.10%                    | 7.66%                    |
| Autism Spectrum Disorder                        | 0.70%                     | 0.81%                    |
| Bipolar disorder                                | 11.80%                    | 10.73%                   |
| Other mood disorders                            | 16.10%                    | 19.58%                   |
| Schizophrenia and other psychiatric disorders   | 5.30%                     | 6.51%                    |
| PTSD, trauma, and stressor-related disorders    | 38.70%                    | 34.43%                   |
| Personality disorders                           | 1.00%                     | 0.97%                    |
| Digital access in household (zip code-based), % |                           |                          |
| Computer, smart phone, tablet, or other device  | 90.10%                    | 90.20%                   |
| Internet                                        | 84.20%                    | 84.55%                   |
| Broadband                                       | 84.00%                    | 84.33%                   |

Table A1-2. Comparison of FQHCs characteristics: study sample vs Massachusetts vs US FQHCs (2020)

|                                           | FQHCs in study sample (N=11 FQHCs) | FQHCs in Massachusetts (N=37 FQHCs) | FQHCs in US (N=1375 FQHCs) |
|-------------------------------------------|------------------------------------|-------------------------------------|----------------------------|
| Age group, %                              |                                    |                                     |                            |
| Children (<18)                            | 17.2%                              | 16.5%                               | 22.2%                      |
| Adults (18-64)                            | 69.5%                              | 70.0%                               | 64.1%                      |
| Elderly (>=65)                            | 13.0%                              | 12.2%                               | 11.3%                      |
| Female, %                                 | 56.0%                              | 54.4%                               | 56.5%                      |
| Non-white, %                              | 60.4%                              | 65.4%                               | 59.0%                      |
| Primary language other than English, %    | 31.6%                              | 33.1%                               | 20.9%                      |
| Enrolled in Medicaid, %                   | 42.9%                              | 43.6%                               | 41.9%                      |
| Under 100% of federal poverty level, %    | 53.0%                              | 62.9%                               | 64.5%                      |
| Urban service area, %                     | 81.8%                              | 81.1%                               | 58.0%                      |
| Unique patients served/FQHC (annual mean) | 24,255                             | 20,558                              | 20,793                     |
| Using any real time telehealth in 2020, % | 100.0%                             | 100.0%                              | 97.0%                      |
| EHR at all sites, %                       | 100.0%                             | 100.0%                              | 99.6%                      |

*Note:* Characteristics represent all FQHC patients, as reported in the 2020 Uniform Data System (UDS). Characteristics are not limited to patients covered by Medicaid. In contrast, our study population includes only Medicaid enrollees age 18-64. Nonetheless, these data compare characteristics at the FQHC facilities based on available data. These data may inform generalizability of our study results – the association between telehealth availability and service use may or may not differ across FQHCs with different characteristics.

## eAppendix 2. Defining telehealth

For encounters that were otherwise flagged as patient visits within the EHR, we classified a visit as a telehealth visit if any of the following were true:

Table A2-1. Codes used to identify telehealth visits

| Encounter type or encounter type description contained the following text string | CPT codes contained in charge fields included the following           |
|----------------------------------------------------------------------------------|-----------------------------------------------------------------------|
| Video*<br>Zoom*<br>Teleh*<br>Telemed*<br>Phon*<br>Virtual*<br>Tele Ofc*          | 99441-99443 (with modifier GT, 95, or V3)<br>99211-99215; 99201-99205 |

Further, we excluded from the telehealth definition instances where encounter type included: “COVID” or “triage.”

All encounter types, encounter type descriptions, and charge codes were reviewed by two research team members, our analytic vendor, and by the C3 ACO leadership team. This included manually reviewing and classifying over 5,500 encounter type descriptions.

### **eAppendix 3. Defining high versus low telehealth FQHCs**

To categorize FQHCs as “high” versus “low” telehealth FQHCs, for each FQHC, we examined the percentage of all FQHC visits that were delivered via telehealth during our post-period (i.e. April 2020 – March 2021). For qualitative validation, we compared these estimates to two external sources of FQHC-level telehealth availability, which weren’t specific to mental health: (1) biweekly survey data, reported by every FQHC to HRSA during the COVID-19 pandemic, that reported the percentage of all medical visits delivered via telehealth and (2) a C3 ACO-administrated telehealth assessment, that qualitatively categorized each FQHC’s telehealth adoption level. In instances where our study population estimates did not qualitatively align with the other data sources (i.e., in instances where EHR data likely underreported telehealth use, as rates were very low), we considered these EHR classifications invalid and excluded those FQHCs from our sample.

Among FQHCs with valid EHR telehealth data, we examined the distribution of “percentage telehealth visits among all visits” from April 2020 – March 2021. Percentages ranged from 11% to 88%. The 50% threshold was where the two groups naturally diverged: within the study population, all FQHCs had either >53% or <34% of visits delivered via telehealth (i.e. no FQHCs delivered 34-53% of visits via telehealth – it was always higher or lower than this range). In the “high telehealth” group, the percentage ranged from 54-88% of visits (mean=68.0%). In the “low telehealth” group, the percentage ranged from 11-34% of visits (mean=25.7%).

#### eAppendix 4. Identifying video vs audio-only telehealth visits

Identifying whether telehealth visits are audio only versus video is challenging, as data are often missing in EHRs and the validity of these EHR and claims measures is not well understood. This has recently been described in the literature ([Hailu et al, 2022](#)).

Nevertheless, we were able to estimate the distribution of telehealth visits that were audio only vs telehealth. We did this using “encounter type” codes in the EHRs and charge data from FQHC billing systems. For all patient encounters that were otherwise flagged as telehealth, we further classified telehealth visits as “video” vs “audio-only” if any of the following were true:

**Table A4-1. Codes used to differentiate video vs audio telehealth visits**

|                   | <b>Encounter type or encounter type description contained the following text string</b>                                                                                                         | <b>CPT codes contained in charge fields include the following</b> |
|-------------------|-------------------------------------------------------------------------------------------------------------------------------------------------------------------------------------------------|-------------------------------------------------------------------|
| Video visits      | video (e.g., “Video – Medical Short 20” ; “Psych Video 20 F/U Visit”)<br><br>zoom (e.g., “Zoom visit”)<br><br>virtual (e.g., “Virtual New Patient Initial” ; “Virtual Behavioral Health Visit”) | 99211-99215; 99201-99205                                          |
| Audio-only visits | phon* (e.g., “Phone Preventive Care 30” ; “Phone Visit 20” ; “Psych Phone 20 F/U Visit”)                                                                                                        | 99441-99443                                                       |

Within our study population, of all FQHC encounters (i.e. visits) that were otherwise flagged as telehealth, 55% were classified as either video or audio-only. The remaining 45% of telehealth visits could not be classified. Of the 55% that were classified, 36% were classified as video and 64% were classified as audio-only. We report these statistics within our manuscript, but do so with the caveat that these classifications are subject to numerous limitations.

All encounter types, encounter type descriptions, and charge codes were reviewed by two research team members, our analytic vendor, and by the C3 ACO leadership team.
